# Supplementary material for: Fusion, fission, and transport control asymmetric inheritance of mitochondria and protein aggregates
Source: PubMed Central journal article supplement — J Cell Biol. 2017 Aug 7;216(8):2481–98. doi: 10.1083/jcb.201611197 (PMC5551707; doi:10.1083/jcb.201611197), 2017-08-07
Supplement: JCB_201611197_sm.pdf [file JCB_201611197_sm.pdf]

Böckler et al., <https://doi.org/10.1083/jcb.201611197>

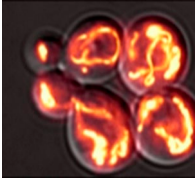

Video 1. **WT cells expressing mtGFP were cultured to logarithmic growth in glucose-containing selective complete medium at 25°C, incubated at 37°C for 20 min, and analyzed for 1 h by time-resolved 3D fluorescence microscopy at 37°C.** Cells were constantly supplied with fresh glucose-containing rich medium and imaged in 2-min intervals by taking z stacks of differential interference contrast and mtGFP fluorescence. The video shows 3 frames per second, accordingly 10 s of video time equal 1 h of real time. One focal plane of the differential interference contrast is merged with a maximum intensity projection of fluorescence signal.

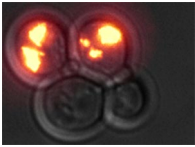

Video 2. ***fzo1-1* cells were analyzed as in Video 1.**

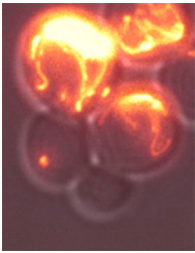

Video 3. ***myo2(LQ)* cells were analyzed as in Video 1.**

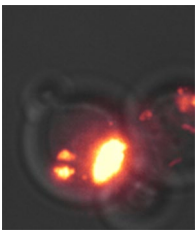

Video 4. ***myo2(LQ) fzo1-1* cells were analyzed as in Video 1.**

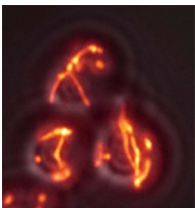

Video 5. **WT cells expressing mtGFP were cultured to logarithmic growth in glucose-containing selective complete medium at 30°C.** Cells were analyzed for 1 h by time-resolved 3D fluorescence microscopy as in Video 1, with the exception that the temperature was 30°C.

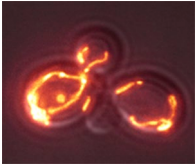

Video 6. *Δmmr1* cells were analyzed as in Video 5.

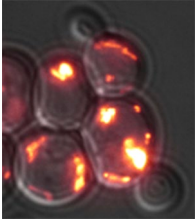

Video 7. *Δfzo1* cells were analyzed as in Video 5.

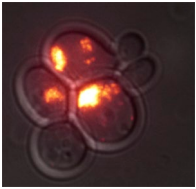

Video 8. *Δfzo1 Δmmr1* cells were analyzed as in Video 5.

**Tables S1-S4 are available as Excel files.**

**Table S1 lists genes and genetic interaction scores from two independent SGA screens of the MATa yeast deletion collection with *myo2(LQ)*.**

**Table S2 lists genes that negatively interacted with *myo2(LQ)* in SGA screens.**

**Table S3 lists yeast strains used in this study.**

**Table S4 details data pooling and statistics.**
